# Supplementary material for: Polyelectrolyte-grafted Ti3C2-MXenes stable in extreme salinity aquatic conditions for remediation of contaminated subsurface environments
Source: Royal Society of Chemistry journal article supplement (doi:10.1039/d0ra04348f), 2020-01-01
Supplement: d0ra04348f1.pdf [file d0ra04348f1.pdf]

**Polyelectrolyte-grafted  $\text{Ti}_3\text{C}_2$ -MXenes stable in  
extreme salinity aquatic conditions for remediation  
of contaminated subsurface environments  
(Electronic Supplementary Information)**

*Sehyeong Lim, Hyunsu Park, Jin Hyung Kim, Jeewon Yang, Chaesu Kwak, Jieun Kim, Seoung Young Ryu, and Joohyung Lee\**

Department of Chemical Engineering, Myongji University, 116 Myongji-ro, Cheoin-gu,  
Yongin, Gyeonggi-do, 17058, Korea

Corresponding Author

\*Email: [ljbroy@mju.ac.kr](mailto:ljbroy@mju.ac.kr)

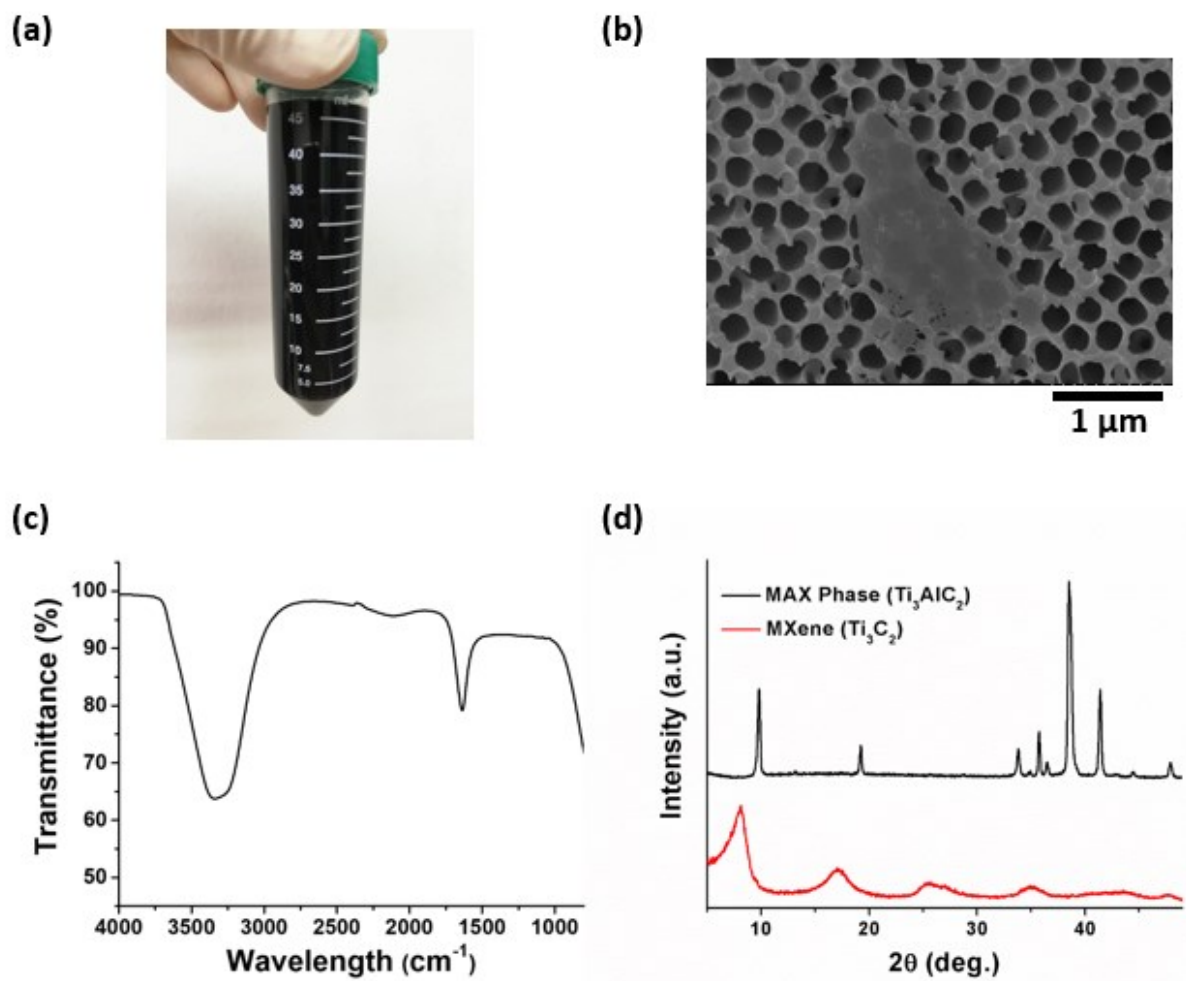

**Figure S1.** (a) The aqueous dispersion of delaminated  $\text{Ti}_3\text{C}_2$ -MXenes. (b) SEM image and (c) FTIR spectra of delaminated  $\text{Ti}_3\text{C}_2$ -MXenes. (d) XRD spectra of  $\text{Ti}_3\text{AlC}_2$ -MAX phase and delaminated  $\text{Ti}_3\text{C}_2$ -MXenes.

| Probe sonication | Storage time (Day)                                                                 |                                                                                    |                                                                                    |                                                                                     |                                                                                      |                                                                                      |                                                                                      |
|------------------|------------------------------------------------------------------------------------|------------------------------------------------------------------------------------|------------------------------------------------------------------------------------|-------------------------------------------------------------------------------------|--------------------------------------------------------------------------------------|--------------------------------------------------------------------------------------|--------------------------------------------------------------------------------------|
|                  | 1                                                                                  | 2                                                                                  | 3                                                                                  | 4                                                                                   | 5                                                                                    | 6                                                                                    | 7                                                                                    |
| Not Applied      |   |   |   |   |   |   |   |
| Applied          |  |  |  |  |  |  |  |

**Figure S2.** The MXene-*g*-poly(DMAPS-*co*-AA) in API brine, prepared with (lower) or without (upper) applied probe-sonication.

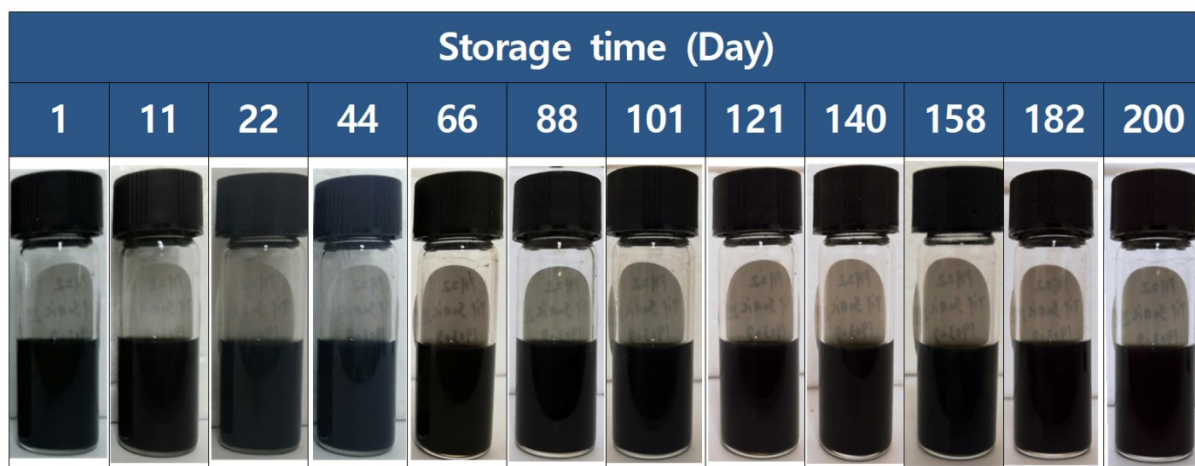

**Figure S3.** Long-term colloidal stability of the MXene-g-poly(DMAPS-co-AA) in API brine.

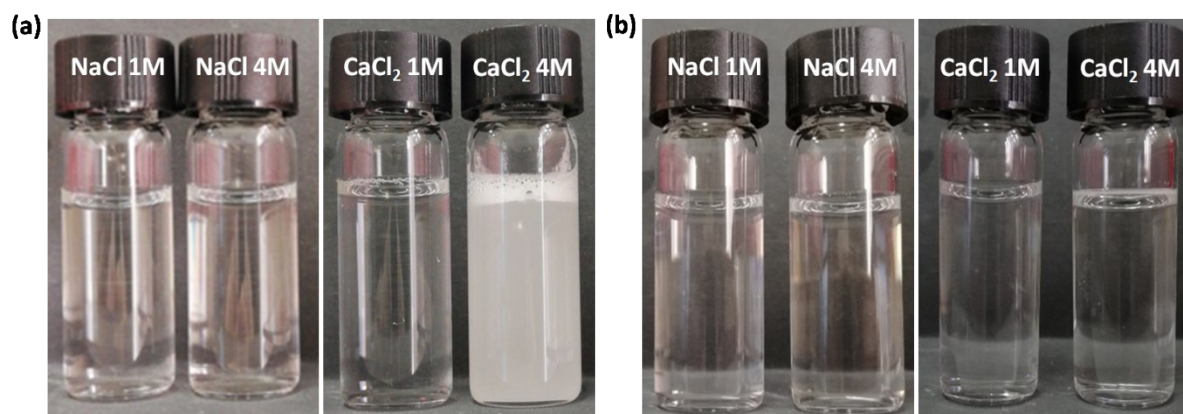

**Figure S4.** Phase behavior of the (a) poly(AMPS-co-AA) and (b) poly(DMAPS-co-AA) in high-salinity NaCl and CaCl<sub>2</sub> solutions, at the salt concentration ( $C_s$ ) of  $C_s = 1$  M and 4 M.

| MXene- <i>g</i> -PE                        | Storage time (Day)                                                                |                                                                                   |                                                                                   |                                                                                   |                                                                                   |                                                                                   |                                                                                   |                                                                                    |                                                                                     |                                                                                     |                                                                                     |                                                                                     |                                                                                     |
|--------------------------------------------|-----------------------------------------------------------------------------------|-----------------------------------------------------------------------------------|-----------------------------------------------------------------------------------|-----------------------------------------------------------------------------------|-----------------------------------------------------------------------------------|-----------------------------------------------------------------------------------|-----------------------------------------------------------------------------------|------------------------------------------------------------------------------------|-------------------------------------------------------------------------------------|-------------------------------------------------------------------------------------|-------------------------------------------------------------------------------------|-------------------------------------------------------------------------------------|-------------------------------------------------------------------------------------|
|                                            | 1                                                                                 | 6                                                                                 | 11                                                                                | 16                                                                                | 22                                                                                | 28                                                                                | 35                                                                                | 38                                                                                 | 42                                                                                  | 45                                                                                  | 50                                                                                  | 57                                                                                  | 66                                                                                  |
| MXene- <i>g</i> -poly(AMPS- <i>co</i> -AA) |  |  |  |  |  |  |  |  |  |  |  |  |  |

**Figure S5.** Long-term colloidal stability of the MXene-*g*-poly(AMPS-*co*-AA), with the grafted poly(AMPS-*co*-AA) of a high  $M_w$  (1,219,631 g mol<sup>-1</sup>) in API brine.

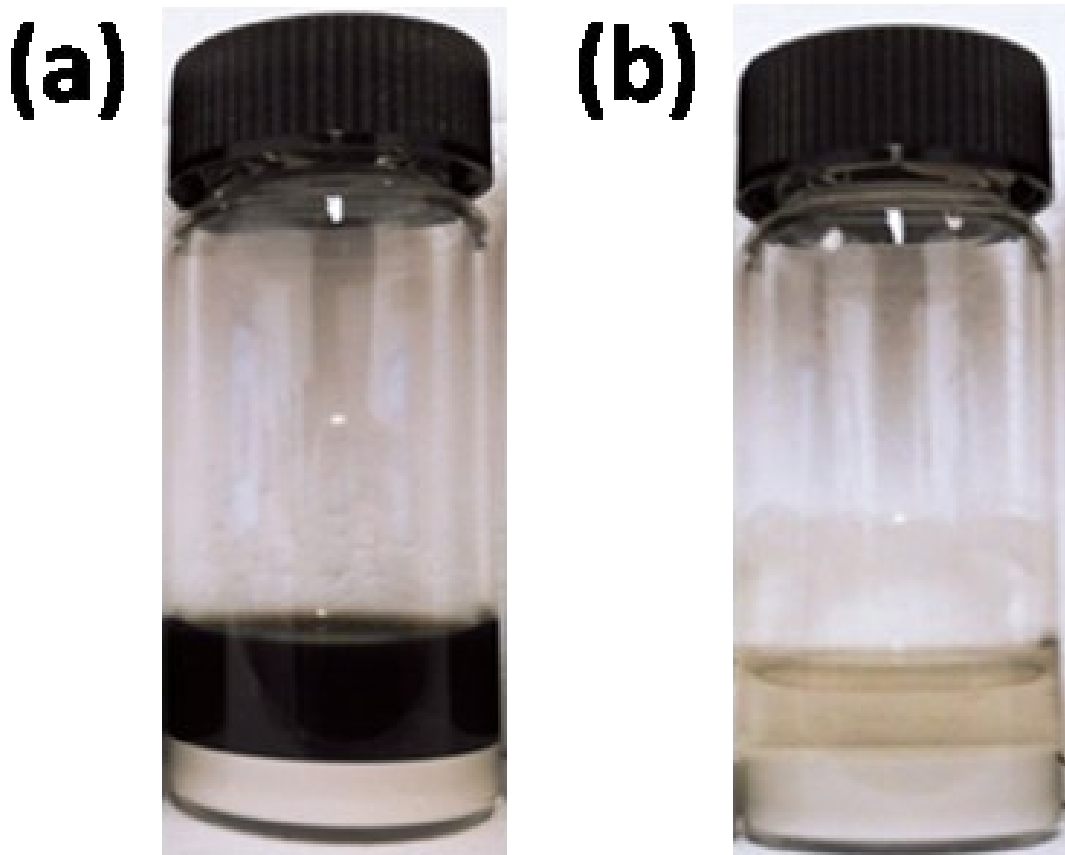

**Figure S6.** Adsorption of the MXene-*g*-poly(AMPS-*co*-AA), with the grafted poly(AMPS-*co*-AA) of a high  $M_w$  ( $1,219,631 \text{ g mol}^{-1}$ ) onto 4 g of  $\leq 10 \mu\text{m}$   $\alpha\text{-Al}_2\text{O}_3$  (BET surface area of  $2.32 \text{ m}^2 \text{ g}^{-1}$ ) in (a) DI water and (b) API brine.

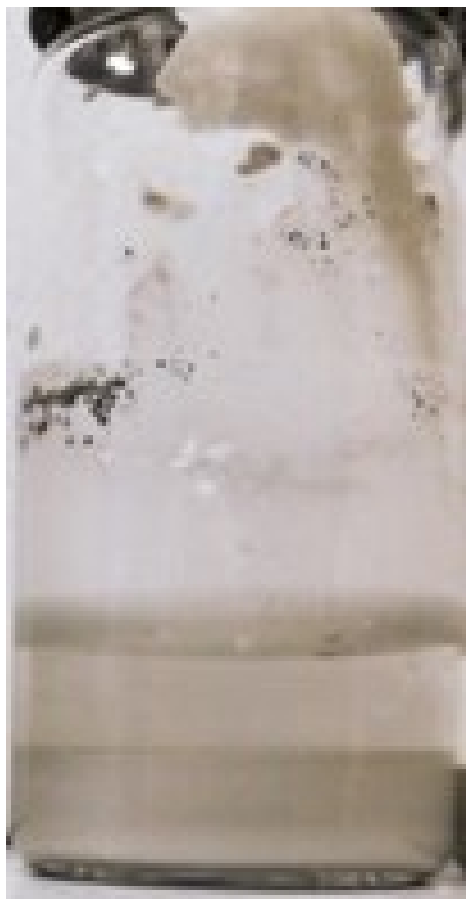

**Figure S7.** Adsorption of the MXenes physically (*not* covalently) grafted with poly(DMAPS-*co*-AA) onto 4 g of  $\leq 10\mu\text{m}$   $\alpha\text{-Al}_2\text{O}_3$  (BET surface area of  $2.32\text{ m}^2\text{ g}^{-1}$ ) in API brine.



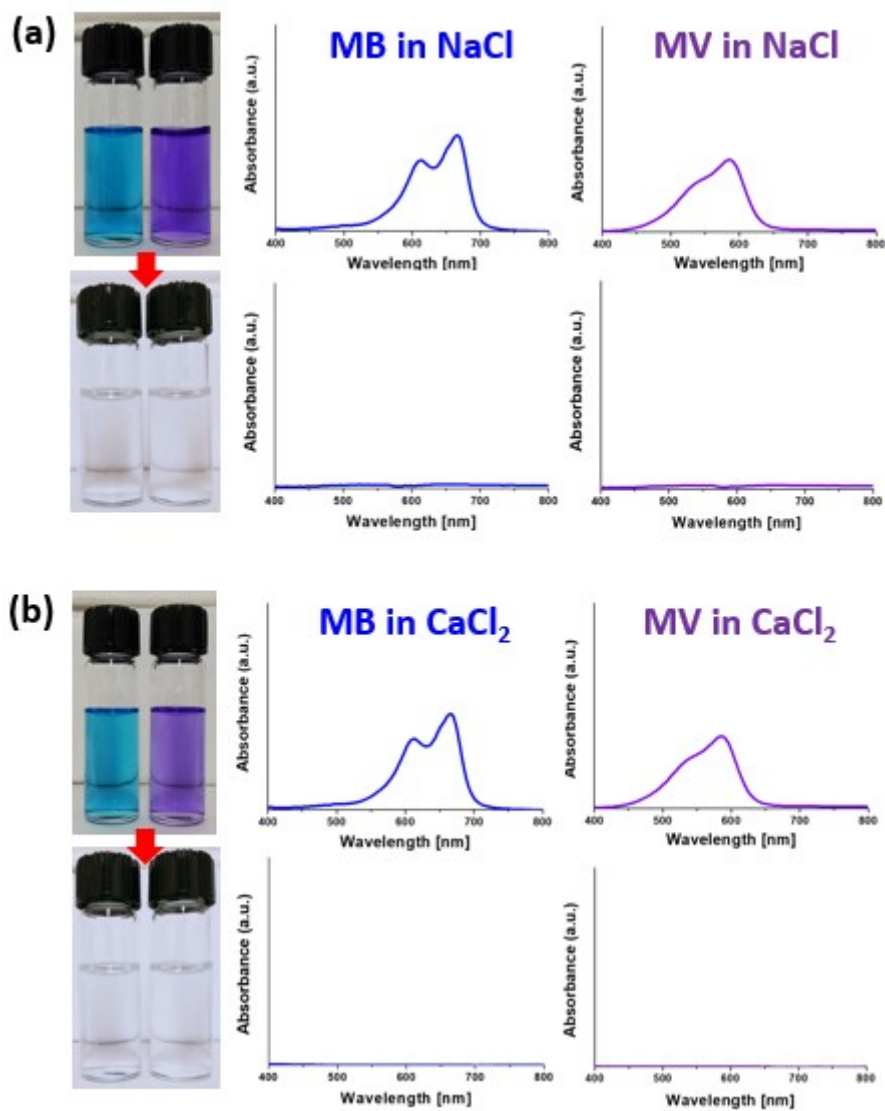

**Figure S8.** The removal of ~5 ppm of MB or MV by the MXene-*g*-poly(AMPS-*co*-AA) in (a) ~0.3 M NaCl and (b) ~0.3 M CaCl<sub>2</sub> solutions, demonstrated by photo images and UV-vis spectroscopy.

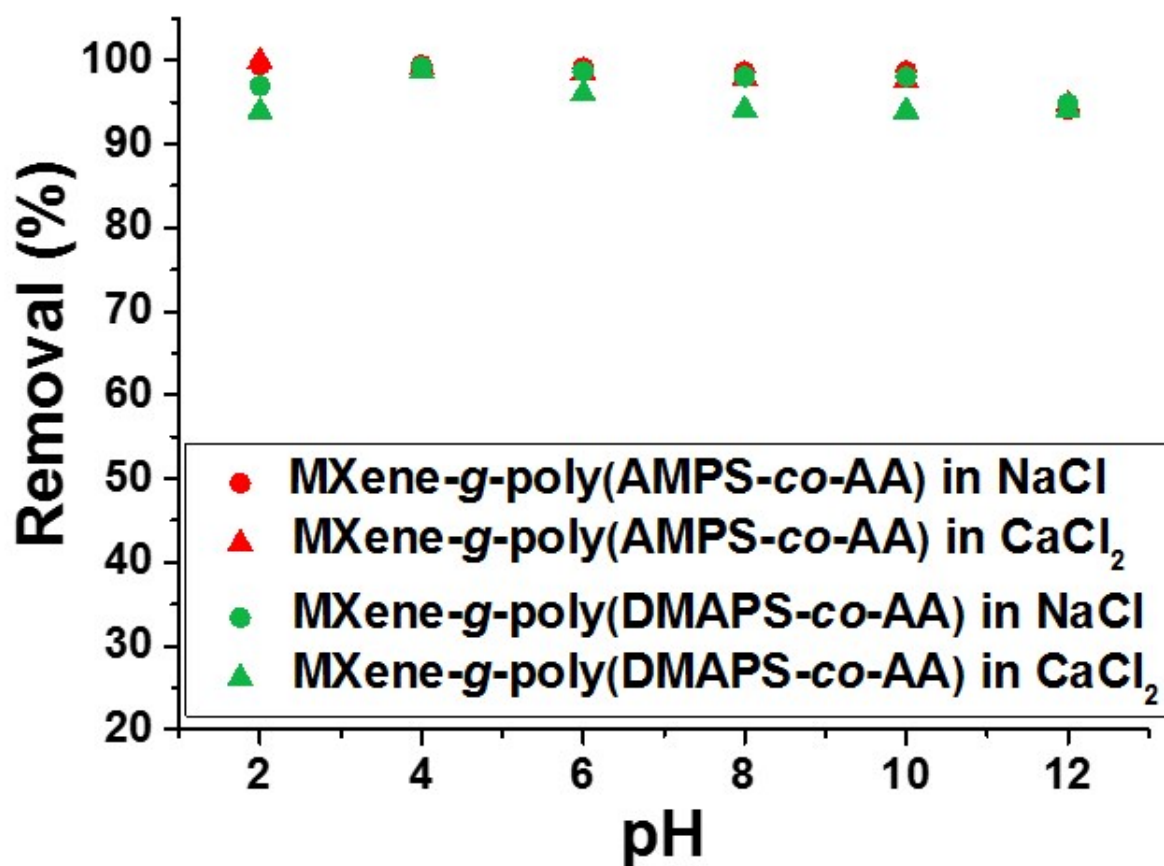

**Figure S9.** The MB removal efficiencies of the MXene-g-poly(AMPS-co-AA) (red) and MXene-g-poly(DMAPS-co-AA) (green) investigated for ~0.3 M NaCl (circles) and ~0.3M CaCl<sub>2</sub> solution (triangles) with different pH values (2 – 12) contaminated with ~5 ppm of MB.

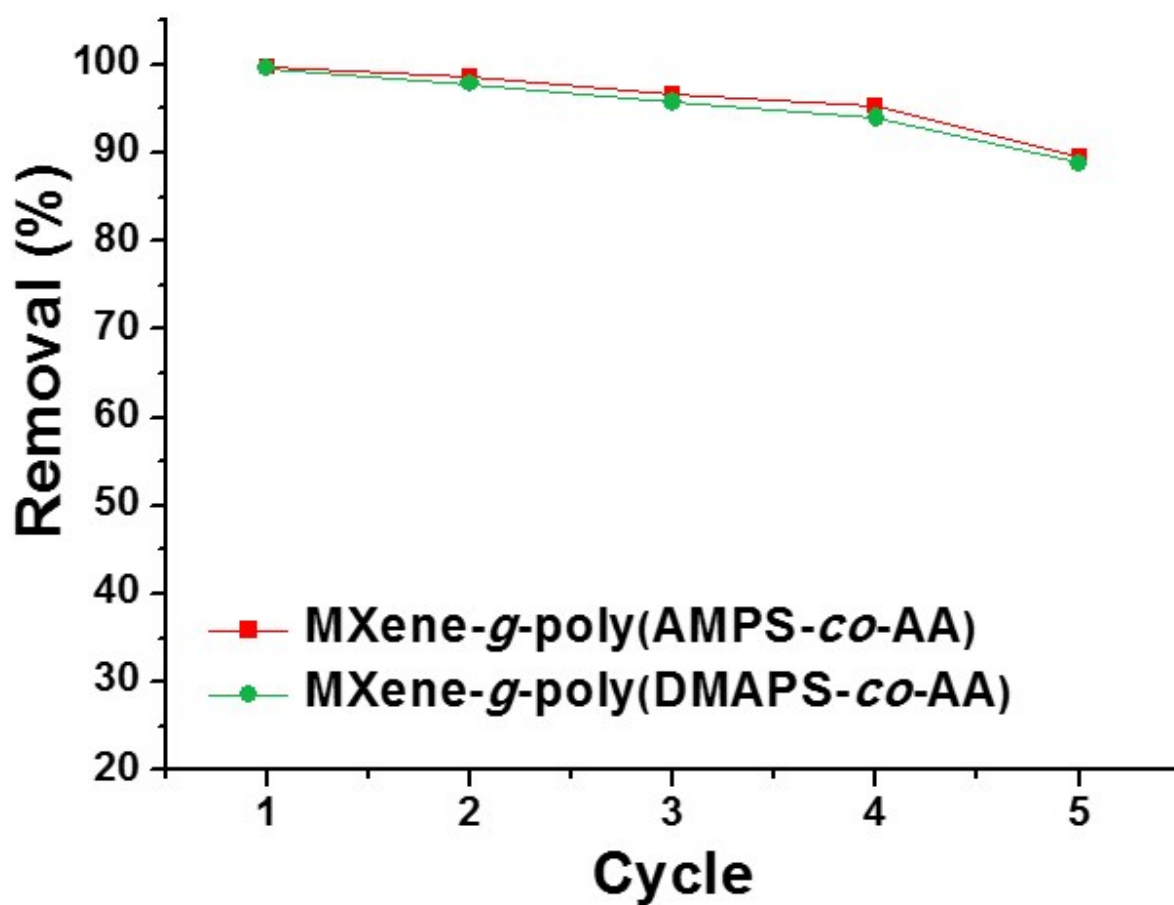

**Figure S10.** The MB removal efficiencies of the MXene-g-poly(AMPS-co-AA) (red squares) and MXene-g-poly(DMAPS-co-AA) (green circles) during five repeated tests performed on  $\sim 0.3$  M  $\text{CaCl}_2$  solutions (pH = 8) contaminated with  $\sim 5$  ppm of MB.
